# Supplementary material for: Experimental and computational electrochemistry of quinazolinespirohexadienone molecular switches – differential electrochromic vs photochromic behavior
Source: Beilstein J Org Chem. 2019 Oct 18;15:2473–85. doi: 10.3762/bjoc.15.240 (PMC6808210; doi:10.3762/bjoc.15.240)
Supplement: File 2 — Complete data sets for experimental and computational reduction potentials of all compounds. [file Beilstein_J_Org_Chem-15-2473-s002.xlsx]

## Sheet: Exptl Ered Data (all trials)
Webb et al 2019 exptl echem data, all units in V.																					PHOTOGENERATED LW
Compound	Experimenter	Instrument	Notebook	Filename	iR comp	Fc pk1	Fc pk2	Fc pk width	ferrocene corr	SCE corr	raw SW half pk	raw LW.- redn pk	raw LW.- oxdn pk	LW.- pk wd	raw LW redn	raw LW oxdn	LW pk wd	SW vs SCE	LW.- vs SCE	LW vs SCE	raw LW.- redn pk	raw LW.- oxdn pk	LW.- pk wd	raw LW redn	raw LW oxdn	LW pk wd	LW.- vs SCE	LW vs SCE	NOTES
3a	Sluiter	BAS	KBS1069	20100707/NNdmQ photogenerated	215	0.125	0.063	0.062	0.094	0.38											-1.301	-1.213	0.088	-1.045	-0.982	0.063	-0.971	-0.7275
3a	Sluiter	BAS	KBS1087i	20100909/KBS1087i	210	0.142	0.081	0.061	0.1115	0.38											-1.355	-1.27	0.085	-1.031	-0.969	0.062	-1.044	-0.7315
3a	Sluiter	BAS	KBS1149d	20110526/KBS1149d	225	0.122	0.062	0.06	0.092	0.38	-1.953	-1.482	-1.363	0.119	-1.188	-1.116	0.072	-1.665	-1.1345	-0.864
3a	Sluiter	BAS	KBS1151i	20110526/KBS1151i	225	0.122	0.062	0.06	0.092	0.38											-1.327	-1.193	0.134	-1.048	-0.98	0.068	-0.972	-0.726
3a	Sluiter	BAS	KBS1153g	20110526/KBS1153g	235	0.122	0.062	0.06	0.092	0.38	-1.9705	-1.567	-1.33	0.237	-1.184	-1.12	0.064	-1.6825	-1.1605	-0.864
3a	Moerdyk	CHI	JPM	20080603/NNdmq9	172	0.074	0.013	0.061	0.0435	0.38	-1.9514				-1.2051	-1.1652	0.0399	-1.6149		-0.84865									not listed in notebook
3a	Moerdyk	CHI	JPM4109	20080828 JPM4109 Photolyzed NNdmQ/photolyzed NNdmQ1- LW window	160	0.085	0.019	0.066	0.052	0.38											-1.42	-1.319	0.101	-1.101	-1.033	0.068	-1.0415	-0.739	small impurity at -0.809
3a	Moerdyk	CHI	JPM4109	20080828 JPM4109 Photolyzed NNdmQ/NNdmQ9- Post 25 scan	160	0.085	0.019	0.066	0.052	0.38		-1.5757	-1.4485	0.1272	-1.225	-1.152	0.073		-1.1841	-0.8605									Jitter	Ask JGG
3a	Moerdyk	CHI	JPM4109	20080828 JPM4109 Photolyzed NNdmQ/NNdmQ5- wide scan	160	0.085	0.019	0.066	0.052	0.38	-1.936							-1.608											Reductions not extractable
3a	Moerdyk	CHI	JPM4109	20080828 JPM4109 Photolyzed NNdmQ/photolyzed NNdmQ4- post 25 scan LW window	160	0.085	0.019	0.066	0.052	0.38											-1.4086	-1.3134	0.0952	-1.0988	-1.0314	0.0674	-1.033	-0.7371
3a	Sluiter	CHI	KBS1111	KBS 10-28-10/KBS1111g	160	0.121	0.062	0.059	0.0915	0.38	-1.8695				-1.2029	-1.1461	0.0568	-1.581		-0.886
3a	Sluiter	CHI	KBS1113	KBS 10-28-10/KBS1113g	160	0.121	0.062	0.059	0.0915	0.38											-1.374	-1.2487	0.1253	-1.0604	-0.9787	0.0817	-1.02285	-0.73105
3a	Sluiter	CHI	KBS2009g	KBS 6-1-11/KBS2009g	165	0.118	0.058	0.06	0.088	0.38	-1.9013	-1.51	-1.3894	0.1206	-1.185	-1.1173	0.0677	-1.6093	-1.1577	-0.85915									Previous potential was for peak not 1/2 peak
3a	Sluiter	BAS	KBS2011	20110606/KBS2011f	228	0.124	0.064	0.06	0.094	0.38	-1.869	-1.493	-1.365	0.128	-1.194	-1.127	0.067	-1.583	-1.143	-0.8745									Only obtain an SW from this CV (keep in keep most not keep few)
3a	Sluiter	BAS	KBS2015	20110606/KBS2015b	235	0.126	0.063	0.063	0.0945	0.38	-1.8945	-1.497	-1.368	0.129	-1.188	-1.129	0.059	-1.609	-1.147	-0.873									impurity ca. -1.7, very weak LW.-, impurity may be Lwradical anion	Not in KBS most, in KBS few
3a	Webb	BAS	EWW3133	20150108/dmQSHD3-Electro, dmQSHD3-Photo	190	0.123	0.062	0.061	0.0925	0.38	-1.964				-1.196	-1.121	0.075	-1.6765		-0.871	-1.408	-1.303	0.105	-1.057	-0.9793	0.0777	-1.068	-0.73065	LW radical anion oxidation not clear in electrogen
3a	Webb	BAS	EWW3149	20150205/EWW3147_dmQSHDelectrogeneration0009	245	0.129	0.068	0.061	0.0985	0.38	-1.934	-1.715	-1.61	0.105	-1.183	-1.115	0.068	-1.6525	-1.381	-0.8675									Really hard to oxidize/reduce LW•-
3a	Webb	BAS	EWW3153	20150212/EWW3153_dmQSHDphotoLW, dmQSHDphotoSWFull	210	0.126	0.065	0.061	0.0955	0.38	-1.91							-1.6255			-1.387	-1.306	0.081	-1.049	-0.9622	0.0868	-1.062	-0.7211	LW·- oxidation not clear but extractable
3a	Webb	BAS	EWW4007	20150212/EWW3153_dmQSHDphotoSW	210	0.126	0.065	0.061	0.0955	0.38	-1.954							-1.6695
3a	Webb	BAS	EWW4013	20150219/EWW4013_dmQSHDpLW	305	0.128	0.066	0.062	0.097	0.38											-1.379	-1.272	0.107	-1.04	-0.984	0.056	-1.0425	-0.729
3a	Webb	BAS	EWW4015	20150224/EWW4015_dmQSHD(Swfull), dmQSHDeLW2	240	0.117	0.056	0.061	0.0865	0.38	-1.914	-1.732	-1.636	0.096	-1.2	-1.117	0.083	-1.6205	-1.3905	-0.865
3a	Webb	BAS	EWW4017	20150224/EWW4017_SW1, dmQSHDeLW1	240	0.117	0.056	0.061	0.0865	0.38	-1.933	-1.704	-1.633	0.071	-1.215	-1.118	0.097	-1.6395	-1.375	-0.873
3a	Webb	BAS	EWW4025	20150408/EWW4025_dmQSHD1,dmQSHD5	230	0.119	0.071	0.048	0.095	0.38	-1.914	-1.681	-1.554	0.127	-1.172	-1.106	0.066	-1.629	-1.3325	-0.854									Run at 500 mV/s
3a	Webb	BAS	EWW4025	20150408/EWW4025_dmQSHD8	230	0.119	0.071	0.048	0.095	0.38	-1.927	-1.684	-1.576	0.108	-1.181	-1.115	0.066	-1.642	-1.345	-0.863									Run at 500 mV/s
3a	Webb	BAS	EWW4023	20150402/EWW4023_dmQSHD3,dmQSHD1	225	0.121	0.059	0.062	0.09	0.38	-1.91	-1.695	-1.62	0.075	-1.206	-1.131	0.075	-1.62	-1.3675	-0.8785									100 mV/s
3a	Webb	BAS	EWW4023	20150402/EWW4023_dmQSHD8,dmQSHD12	225	0.121	0.059	0.062	0.09	0.38	-1.935				-1.179	-1.119	0.06	-1.645		-0.859									100 mV/s, eLW radical anion not evident
Scroll right for statistics….																	Average	-1.63182	-1.25986	-0.8663						Average	-1.02854	-0.730322
																	Median	-1.62725	-1.2583	-0.8645						Median	-1.0415	-0.73065
																	Max	-1.581	-1.1345	-0.84865						Max	-0.971	-0.7211
																	Min	-1.6825	-1.3905	-0.886						Min	-1.068	-0.739
																	Max-Min	0.1015	0.256	0.03735						Max-Min	0.097	0.0179
																	STD Dev	0.0297171	0.111709	0.00945694						STD Dev	0.0350685	0.00543956
																	n	18	12	16						n	9	9
																	Max Dev	0.0508167	0.130642	0.0197						Max Dev	0.0575389	0.00922222
																	MaxD/StD	1.71001	1.16948	2.08313						MaxD/StD	1.64076	1.6954
3b	Sluiter	BAS	KBS1075f	20100708/KBS1075f	185	0.124	0.063	0.061	0.0935	0.38	-1.896	-1.345	-1.268	0.077	-1.135	-1.086	0.049	-1.6095	-1.02	-0.824
3b	Sluiter	BAS	KBS1137D	20110304/KBS1137D	211	0.12	0.06	0.06	0.09	0.38	-1.9	-1.39	-1.342	0.048	-1.191	-1.112	0.079	-1.61	-1.076	-0.8615
3b	Sluiter	BAS	KBS1141i	20110311/KBS1141i	195	0.124	0.064	0.06	0.094	0.38											-1.349	-1.245	0.104	-1.054	-0.988	0.066	-1.011	-0.735
3b	Sluiter	BAS	KBS1155e	20110527/KBS1155e	224	0.124	0.064	0.06	0.094	0.38	-1.915	-1.398	-1.315	0.083	-1.176	-1.103	0.073	-1.629	-1.0705	-0.8535
3b	Sluiter	BAS	KBS1155q	20110527/KBS1155q	224	0.124	0.064	0.06	0.094	0.38						-1.124					-1.374	-1.27	0.104	-1.05	-0.981	0.069	-1.036	-0.7295
3b	Moerdyk	CHI	JPM4113	20080904 JPM4113 Photolyzed NNmQ and Parent/NNmQ5- post25scan LW only	135	0.07	0.009	0.061	0.0395	0.38		-1.4471	-1.317	0.1301	-1.203	-1.143	0.06		-1.04155	-0.8325
3b	Moerdyk	CHI	JPM4113	20080904 JPM4113 Photolyzed NNmQ and Parent/photolyzedNNmQ1 LW window	135	0.07	0.009	0.061	0.0395	0.38											-1.378	-1.2921	0.0859	-1.103	-1.036	0.067	-0.99455	-0.729
3b	Moerdyk	CHI	JPM4113	20080904 JPM4113 Photolyzed NNmQ and Parent/NNmQ3- Full Window	135	0.07	0.009	0.061	0.0395	0.38	-1.9575	-1.4474	-1.3856	0.0618	-1.203	-1.1526	0.0504	-1.617	-1.076	-0.8373									Extracted eLW
3b	Moerdyk	CHI	JPM4113	20080904 JPM4113 Photolyzed NNmQ and Parent/NNmQ6- post25scan LW only	135	0.07	0.009	0.061	0.0395	0.38		-1.4369	-1.3168	0.1201	-1.201	-1.143	0.058		-1.03635	-0.8315
3b	Moerdyk	CHI	JPM4113	20080904 JPM4113 Photolyzed NNmQ and Parent/PhotolyzedNNmQ2 full window	135	0.07	0.009	0.061	0.0395	0.38											-1.378	-1.3069	0.0711	-1.097	-1.0426	0.0544	-1.00195	-0.7293
3b	Moerdyk	CHI	JPM4113	20080904 JPM4113 Photolyzed NNmQ and Parent/Photolyzed NNmQ4 post25scan full window	135	0.07	0.009	0.061	0.0395	0.38											-1.37	-1.2618	0.1082	-1.101	-1.0273	0.0737	-0.9754	-0.72365
3b	Moerdyk	CHI	JPM4113	20080904 JPM4113 Photolyzed NNmQ and Parent/PhotolyzedNNmQ5 post25scan full window	135	0.07	0.009	0.061	0.0395	0.38											-1.371	-1.2743	0.0967	-1.096	-1.034	0.062	-0.98215	-0.7245
3b	Moerdyk	CHI	JPM4113	20080904 JPM4113 Photolyzed NNmQ and Parent/PhotolyzedNNmQ6 post25scan full window	135	0.07	0.009	0.061	0.0395	0.38														-1.0943	-1.0271	0.0672		-0.7202	Jitter
3b	Sluiter	CHI	KBS1115	KBS 11-4-10/KBS1115c	176	0.117	0.058	0.059	0.0875	0.38	-1.9201	-1.3989	-1.3142	0.0847	-1.184	-1.1165	0.0675	-1.6276	-1.06405	-0.85775
3b	Sluiter	CHI	KBS1119L	KBS 12-2-10/KBS1119L	148	0.1142	0.0553	0.0589	0.08475	0.38					-1.159	-1.1079	0.0511			-0.8382	-1.3621	-1.2599	0.1022	-1.06	-0.9969	0.0631	-1.01575	-0.7332	good pLW values, don't let eLW (thermal) throw you - maybe try to take eLW values also-Only LW values were taken as the anion radical red/ox was not clear
3b	Sluiter	CHI	KBS1121m	KBS 12-2-10/KBS1121m	148	0.1142	0.0553	0.0589	0.08475	0.38											-1.3169	-1.2863	0.0306	-1.0573	-0.9962	0.0611	-1.00635	-0.7315
3b	Sluiter	CHI	KBS1121p	KBS 12-2-10/KBS1121p	148	0.1142	0.0553	0.0589	0.08475	0.38		-1.4399	-1.3466	0.0933	-1.1734	-1.1133	0.0601		-1.098	-0.8481
3b	Webb	BAS	EWW3135	20150115/mQSHD4-ElectroLW, mQSHD1,	225	0.122	0.061	0.061	0.0915	0.38	-1.933	-1.456	-1.321	0.135	-1.167	-1.106	0.061	-1.6445	-1.1	-0.848				-1.054	-0.9856	0.0684		-0.7313	LW- not evident (too much thermal isomer)
3b	Webb	BAS	EWW3137	20150115/mQSHD1-ElectroLW, mQSHD1,	225	0.122	0.061	0.061	0.0915	0.38	-1.948	-1.452	-1.333	0.119	-1.166	-1.095	0.071	-1.6595	-1.104	-0.842				-1.056	-0.9819	0.0741		-0.73045	LW- not evident (too much thermal isomer), it is present though as increased peak width on the LW- of the thermal isomer
3b	Webb	BAS	EWW3141	20150127/EWW3141_mQSHDLWphoto2	220	0.126	0.064	0.062	0.095	0.38											-1.382	-1.293	0.089	-1.056	-0.9793	0.0767	-1.0525	-0.73265	LW radical anion only a shoulder (post 3 hours of photolysis)
3b	Webb	BAS	EWW3127	20141120/EWW3127_NNmQSHD1	220	0.125	0.065	0.06	0.095	0.38	-1.929							-1.644
3b	Barbu	BAS	BNB2039	20150226/BNB2039mQSHD2	230	0.122	0.06	0.062	0.091	0.38	-1.926							-1.637
Scroll right for statistics….																	Average	-1.6309	-1.06865	-0.843123						Average	-1.00841	-0.729187
																	Median	-1.629	-1.07325	-0.842						Median	-1.00635	-0.729975
																	Max	-1.6095	-1.02	-0.824						Max	-0.9754	-0.7202
																	Min	-1.6595	-1.104	-0.8615						Min	-1.0525	-0.735
																	Max-Min	0.05	0.084	0.0375						Max-Min	0.0771	0.0148
																	STD Dev	0.0170082	0.0286182	0.0117513						STD Dev	0.0244516	0.00433627
																	n	9	10	11						n	9	12
																	Max Dev	0.0286	0.048645	0.0191227						Max Dev	0.0440944	0.0089875
																	MaxD/StD	1.68155	1.69979	1.62728						MaxD/StD	1.80334	2.07263
1a	Moerdyk	CHI	JPM4029	JPM 4029/nmethylparent 4-5 scans	200	0.085	0	0.085	0.0425	0.38	-1.96668	-1.6385	-1.5999	0.0386	-1.2296	-1.1538	0.0758	-1.62918	-1.2817	-0.8542
1a	Sluiter	BAS	KBS2013	20110606/KBS2013e	228	0.124	0.064	0.06	0.094	0.38	-1.9025	-1.506	-1.453	0.053	-1.174	-1.111	0.063	-1.6165	-1.1935	-0.8565
1a	Sluiter	BAS	KBS2017	20110606/KBS2017f	235	0.126	0.063	0.063	0.0945	0.38	-1.8985	-1.495	-1.446	0.049	-1.171	-1.11	0.061	-1.613	-1.185	-0.855
1a	Sluiter	BAS	KBS2021	20110609/KBS2021e	227	0.121	0.06	0.061	0.0905	0.38	-1.9035	-1.499	-1.465	0.034	-1.177	-1.114	0.063	-1.614	-1.1925	-0.856
1a	Sluiter	CHI	KBS2023	KBS 6-9-11/KBS2023c	152	0.115	0.055	0.06	0.085	0.38	-1.89015	-1.4621	-1.4112	0.0509	-1.1721	-1.1226	0.0495	-1.59515	-1.14165	-0.85235
1a	Sluiter	CHI	KBS2023	KBS 6-9-11/KBS2023f	152	0.115	0.055	0.06	0.085	0.38	-1.90735	-1.5065	-1.4659	0.0406	-1.176	-1.1177	0.0583	-1.61235	-1.1912	-0.85185
1a	Webb	BAS	EWW3123	20141113/EWW3123_Electrogeneration0011,N-MePSHD3	225	0.122	0.062	0.06	0.092	0.38	-1.896	-1.569	-1.534	0.035	-1.192	-1.115	0.077	-1.608	-1.2635	-0.8655
1a	Webb	BAS	EWW3129	20150108/N-Me Electrogeneration0011	235	0.123	0.061	0.062	0.092	0.38	-1.992	-1.593	-1.514	0.079	-1.167	-1.104	0.063	-1.704	-1.2655	-0.8475
1a	Webb	BAS	EWW3141	20150127/EWW3141_N-Me1, N-MeElectrogeneration009	220	0.126	0.064	0.062	0.095	0.38	-1.927	-1.562	-1.541	0.021	-1.164	-1.103	0.061	-1.642	-1.2665	-0.8485
1a	Webb	BAS	EWW3141	20150127/EWW3141_N-Me5, N-Me6	220	0.126	0.064	0.062	0.095	0.38	-1.928				-1.217	-1.116	0.101	-1.643		-0.8815									LW.- no discernable reduction peak
Scroll right for statistics….																	Average	-1.62772	-1.22012	-0.85689
																	Median	-1.61525	-1.1935	-0.8546
																	Max	-1.59515	-1.14165	-0.8475
																	Min	-1.704	-1.2817	-0.8815
																	Max-Min	0.10885	0.14005	0.034
																	STD Dev	0.0306864	0.0494762	0.00997839
																	n	10	9	10
																	Max Dev	0.076282	0.0784667	0.02461
																	MaxD/StD	2.48586	1.58595	2.46633
1b	Sluiter	BAS	KBS1089i	20100916/KBS1089i	210	0.143	0.082	0.061	0.1125	0.38											-1.442	-1.311	0.131	-1.164	-1.106	0.058	-1.109	-0.8675	impurity at ca. -1.749
1b	Sluiter	BAS	KBS1091c	20100916/KBS1091c	175	0.135	0.075	0.06	0.105	0.38	-1.941	-1.59	-1.41	0.18	-1.17	-1.109	0.061	-1.666	-1.225	-0.8645
1b	Sluiter	BAS	KBS1093h	20100916/KBS1093h	205	0.142	0.081	0.061	0.1115	0.38											-1.408	-1.319	0.089	-1.161	-1.088	0.073	-1.095	-0.856
1b	Sluiter	BAS	KBS1097a	20100923/KBS1097a	195	0.138	0.079	0.059	0.1085	0.38											-1.437	-1.29	0.147	-1.168	-1.103	0.065	-1.092	-0.864
1b	Sluiter	BAS	KBS1097c	20100923/KBS1097c	195	0.138	0.079	0.059	0.1085	0.38	-1.9295	-1.548	-1.383	0.165	-1.16	-1.1	0.06	-1.658	-1.194	-0.8585									hard to pull LW.- redn, impurity a bit further neg
1b	Sluiter	BAS	KBS1101g	20100930/KBS1101g	205	0.138	0.078	0.06	0.108	0.38											-1.408	-1.326	0.082	-1.168	-1.095	0.073	-1.095	-0.8595
1b	Sluiter	BAS	KBS2007e	20110531/KBS2007e (not d)	230	0.13	0.069	0.061	0.0995	0.38	-1.954	-1.475	-1.408	0.067	-1.182	-1.124	0.058	-1.6735	-1.161	-0.8725									Small impurity at -1.645 V
1b	Moerdyk	CHI	JPM	20080530/Parent1	170	0.078	0.015	0.063	0.0465	0.38	-2.0298							-1.6963											not listed in notebook
1b	Moerdyk	CHI	JPM	20080603/parent1	172	0.074	0.013	0.061	0.0435	0.38	-2.036							-1.6995
1b	Moerdyk	CHI	JPM2107	JPM2107/parent1	206	0.066	0.009	0.057	0.0375	0.38	-2.02495				-1.3109	-1.1667	0.1442	-1.68245		-0.8963									Some Impurities present (-1.58 V)
1b	Moerdyk	CHI	JPM4113	20080904 JPM4113 Photolyzed NNmQ and Parent/Parent4 Post 25 scan LW window	135	0.07	0.009	0.061	0.0395	0.38		-1.587	-1.4962	0.0908	-1.229	-1.1571	0.0719		-1.2011	-0.85255
1b	Moerdyk	CHI	JPM4113	20080904 JPM4113 Photolyzed NNmQ and Parent/Photolyzed Parent1- LW window only	135	0.07	0.009	0.061	0.0395	0.38											-1.599	-1.504	0.095	-1.235	-1.179	0.056	-1.211	-0.8665
1b	Moerdyk	CHI	JPM4113	20080904 JPM4113 Photolyzed NNmQ and Parent/Parent2- Full Window	135	0.07	0.009	0.061	0.0395	0.38	-2.0302							-1.6897											Reductions not extractable
1b	Moerdyk	CHI	JPM4113	20080904 JPM4113 Photolyzed NNmQ and Parent/Photolyzed Parent2- LW window only	135	0.07	0.009	0.061	0.0395	0.38											-1.5954	-1.5054	0.09	-1.233	-1.18	0.053	-1.2099	-0.866
1b	Moerdyk	CHI	JPM4113	20080904 JPM4113 Photolyzed NNmQ and Parent/Photolyzed Parent3- Full window	135	0.07	0.009	0.061	0.0395	0.38											-1.604	-1.559	0.045	-1.237	-1.176	0.061	-1.241	-0.866
1b	Moerdyk	CHI	JPM4113	20080904 JPM4113 Photolyzed NNmQ and Parent/Photolyzed Parent3- Full window	135	0.07	0.009	0.061	0.0395	0.38											-1.588	-1.4864	0.1016	-1.23	-1.1685	0.0615	-1.1967	-0.85875	file not found!
1b	Sluiter	CHI	KBS1105d	KBS 10-14-10/KBS 1105d	176	0.1149	0.0551	0.0598	0.085	0.38	-1.9671				-1.199	-1.124	0.075	-1.6721		-0.8665									can't pull LW.- values
1b	Sluiter	CHI	KBS1105n	KBS 10-14-10/KBS 1105n	176	0.1149	0.0551	0.0598	0.085	0.38											-1.533	-1.4425	0.0905	-1.199	-1.134	0.065	-1.19275	-0.8715	Changed LW.- value
1b	Sluiter	CHI	KBS2031	KBS 6-13-11/KBS2031c	185	0.12	0.06	0.06	0.09	0.38	-1.9704	-1.4746	-1.4249	0.0497	-1.1864	-1.1328	0.0536	-1.6804	-1.15975	-0.8696
1b	Webb	BAS	EWW3147	20150129/EWW3147_PhotogenLW	220	0.13	0.068	0.062	0.099	0.38	-1.965							-1.684			-1.569	-1.464	0.105	-1.188	-1.12	0.068	-1.2355	-0.873
1b	Barbu	BAS	BNB2017	20150129/BNB2017_SWphotchromePSHD1,PSHDElectrogeneration0007,PhotogenerationLW1	220	0.13	0.068	0.062	0.099	0.38	-1.977	-1.539	-1.483	0.056	-1.205	-1.118	0.087	-1.696	-1.23	-0.8805	-1.537	-1.418	0.119	-1.183	-1.114	0.069	-1.1965	-0.8675
1b	Webb	BAS	EWW3147	20150129/EWW3147_PSHD1-SW, PSHDElectrogeneration0005	220	0.13	0.068	0.062	0.099	0.38	-1.962	-1.552	-1.49	0.062	-1.194	-1.118	0.076	-1.681	-1.24	-0.875
Scroll right for statistics….																	Average	-1.68158	-1.20155	-0.870661						Average	-1.1704	-0.865114
																	Median	-1.68173	-1.2011	-0.8696						Median	-1.1965	-0.866
																	Max	-1.658	-1.15975	-0.85255						Max	-1.092	-0.856
																	Min	-1.6995	-1.24	-0.8963						Min	-1.241	-0.873
																	Max-Min	0.0415	0.08025	0.04375						Max-Min	0.149	0.017
																	STD Dev	0.0126991	0.0323689	0.01279						STD Dev	0.0596576	0.00523613
																	n	12	7	9						n	11	11
																	Max Dev	0.0235792	0.0418	0.0256389						Max Dev	0.0783955	0.00911364
																	MaxD/StD	1.85676	1.29136	2.00461						MaxD/StD	1.31409	1.74053

## Sheet: Computed Ered (all 8 corr)
Webb et al 2019, experimental Ered vs. computed Ered on the basis of all 8 correlations in Lynch et al JOC 2012
Cmpd #	Exptl	Error	error^2		Pred 1	delta	abs d	d^2		Pred 2	delta	abs d	d^2		Pred 3	delta	abs d	d^2		Pred 4	delta	abs d	d^2		Pred 5	delta	abs d	d^2		Pred 6	delta	abs d	d^2		Pred 7	delta	abs d	d^2		Pred 8	delta	abs d	d^2	Cmpd # in Lynch 2012
1a	-1.628	0.031	0.000961		-1.683	-0.055	0.055	0.003025		-1.664	-0.036	0.036	0.001296		-1.706	-0.078	0.078	0.006084		-1.72	-0.092	0.092	0.008464		-1.607	0.021	0.021	0.000441		-1.56	0.068	0.068	0.004624		-1.695	-0.067	0.067	0.004489		-1.663	-0.035	0.035	0.001225	76 SW
2a	-0.852	0.01	0.0001		-0.935	-0.083	0.083	0.006889		-0.935	-0.083	0.083	0.006889		-0.972	-0.12	0.12	0.0144		-1.004	-0.152	0.152	0.023104		-0.856	-0.004	0.004	1.6e-05		-0.886	-0.034	0.034	0.001156		-0.931	-0.079	0.079	0.006241		-0.973	-0.121	0.121	0.014641	76 LW
1b	-1.681	0.013	0.000169		-1.836	-0.155	0.155	0.024025		-1.813	-0.132	0.132	0.017424		-1.835	-0.154	0.154	0.023716		-1.846	-0.165	0.165	0.027225		-1.759	-0.078	0.078	0.006084		-1.698	-0.017	0.017	0.000289		-1.83	-0.149	0.149	0.022201		-1.784	-0.103	0.103	0.010609	75 SW
2b	-0.871	0.013	0.000169		-0.947	-0.076	0.076	0.005776		-0.946	-0.075	0.075	0.005625		-0.98	-0.109	0.109	0.011881		-1.012	-0.141	0.141	0.019881		-0.877	-0.006	0.006	3.6e-05		-0.897	-0.026	0.026	0.000676		-0.95	-0.079	0.079	0.006241		-0.98	-0.109	0.109	0.011881	75 LW
3a	-1.632	0.03	0.0009		-1.741	-0.109	0.109	0.011881		-1.72	-0.088	0.088	0.007744		-1.754	-0.122	0.122	0.014884		-1.768	-0.136	0.136	0.018496		-1.671	-0.039	0.039	0.001521		-1.612	0.02	0.02	0.0004		-1.752	-0.12	0.12	0.0144		-1.708	-0.076	0.076	0.005776	78 SW
4a	-0.73	0.005	2.5e-05		-0.754	-0.024	0.024	0.000576		-0.759	-0.029	0.029	0.000841		-0.804	-0.074	0.074	0.005476		-0.841	-0.111	0.111	0.012321		-0.701	0.029	0.029	0.000841		-0.724	0.006	0.006	3.6e-05		-0.781	-0.051	0.051	0.002601		-0.815	-0.085	0.085	0.007225	78 pLW
3a	-0.866	0.009	8.1e-05		-0.925	-0.059	0.059	0.003481		-0.925	-0.059	0.059	0.003481		-0.969	-0.103	0.103	0.010609		-1.002	-0.136	0.136	0.018496		-0.864	0.002	0.002	4e-06		-0.877	-0.011	0.011	0.000121		-0.943	-0.077	0.077	0.005929		-0.971	-0.105	0.105	0.011025	78 eLW
3b	-1.631	0.009	8.1e-05		-1.756	-0.125	0.125	0.015625		-1.735	-0.104	0.104	0.010816		-1.767	-0.136	0.136	0.018496		-1.78	-0.149	0.149	0.022201		-1.691	-0.06	0.06	0.0036		-1.626	0.005	0.005	2.5e-05		-1.77	-0.139	0.139	0.019321		-1.72	-0.089	0.089	0.007921	77 SW
4b	-0.729	0.004	1.6e-05		-0.752	-0.023	0.023	0.000529		-0.756	-0.027	0.027	0.000729		-0.795	-0.066	0.066	0.004356		-0.832	-0.103	0.103	0.010609		-0.705	0.024	0.024	0.000576		-0.721	0.008	0.008	6.4e-05		-0.78	-0.051	0.051	0.002601		-0.807	-0.078	0.078	0.006084	77 pLW
5b	-0.843	0.012	0.000144		-0.901	-0.058	0.058	0.003364		-0.902	-0.059	0.059	0.003481		-0.943	-0.1	0.1	0.01		-0.977	-0.134	0.134	0.017956		-0.837	0.006	0.006	3.6e-05		-0.856	-0.013	0.013	0.000169		-0.916	-0.073	0.073	0.005329		-0.946	-0.103	0.103	0.010609	77 eLW
	MAD	0.011875			MAD	0.078625				MAD	0.071625				MAD	0.108				MAD	0.134375				MAD	0.0305				MAD	0.01325				MAD	0.092375				MAD	0.0935
	RMSD	0.0140757			RMSD	0.0903168				RMSD	0.0791683				RMSD	0.111478				RMSD	0.13564				RMSD	0.0398403				RMSD	0.0149164				RMSD	0.0991356				RMSD	0.0942934
																																												cmpds 77-78 not reported in published version of Lynch 2012
